# Supplementary material for: Physico-Chemical Condition Optimization during Biosynthesis lead to development of Improved and Catalytically Efficient Gold Nano Particles
Source: PubMed Central journal article supplement (PMC4897682; doi:10.1038/srep27575), 2016-06-08
Supplement: srep27575-s1.pdf [file srep27575-s1.pdf]

1 **Supplementary Information**

2 **Physico-Chemical Condition Optimization during Biosynthesis lead to development of Improved and Catalytically Efficient Gold Nano**  
3 **Particles**

4

5 **Madhuree Kumari<sup>1</sup>, Aradhana Mishra<sup>1</sup>, Shipra Pandey<sup>1</sup>, Satyendra Pratap Singh<sup>1</sup>, Vasvi Chaudhry<sup>1</sup>, Mohana Krishna Reddy**  
6 **Mudiam<sup>2</sup>, Shatrunajay Shukla<sup>2</sup>, Poonam Kakkar<sup>2</sup>, C.S. Nautiyal<sup>1\*</sup>**

7 <sup>1</sup>CSIR-National Botanical Research Institute, Rana Pratap Marg, Lucknow, 226 001, India

8 <sup>2</sup>CSIR-Indian Institute of Toxicology Research, 80, Mahatma Gandhi Marg, Lucknow, 226 001, India

9

10 \*Corresponding author:

11 Dr C. S. Nautiyal

12 *Rana Pratap Marg, Lucknow, 226 001, India.*

13 *E mail: nautiyalbri@lycos.com*

14 *Tel/ Fax: 91 522 2206651*

15

16

17

18 **Supplementary Figures:**

19

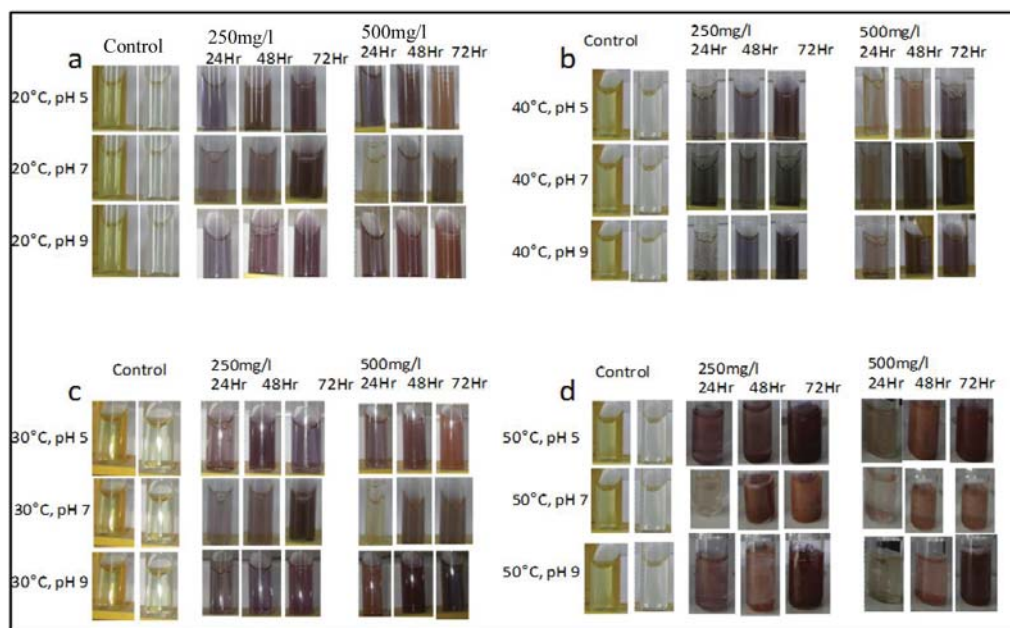

20

21

22 **Figure S1.** Color image of gold nanoparticles biosynthesized at different reaction conditions, pH 5.0, 7.0 and 9.0, time 24, 48 and 72h, HAuCl<sub>4</sub>  
23 concentration- 250 and 500 mg/L (a) at 20°C, (b) at 30°C, (c) at 40°C, (d) at 50°C.

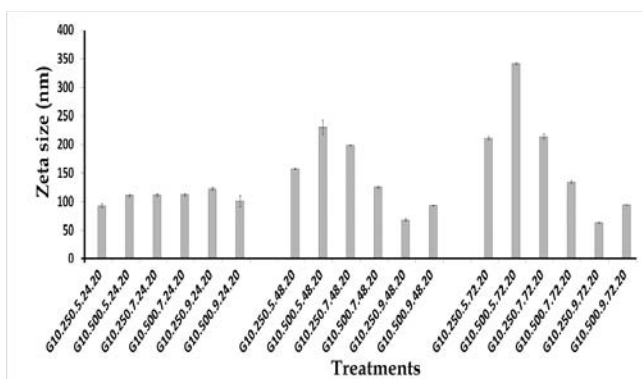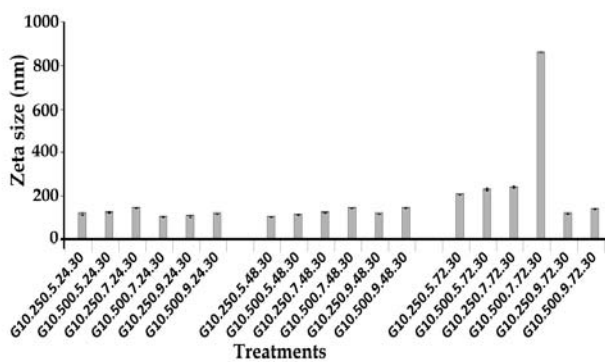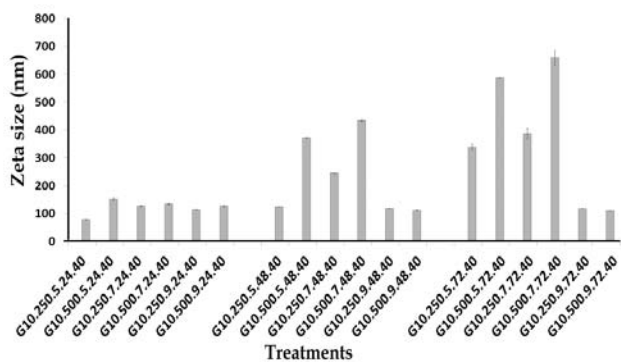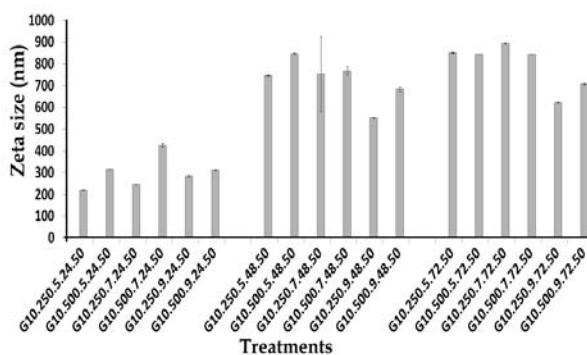

24

25 **Figure S2.** Zeta size of gold nanoparticles biosynthesized at different reaction conditions, pH 5.0, 7.0 and 9.0, time 24, 48 and 72h, HAuCl<sub>4</sub>  
 26 concentration- 250 and 500 mg/L (a) at 20 °C, (b) at 30 °C, (c) at 40 °C, (d) at 50 °C.

27

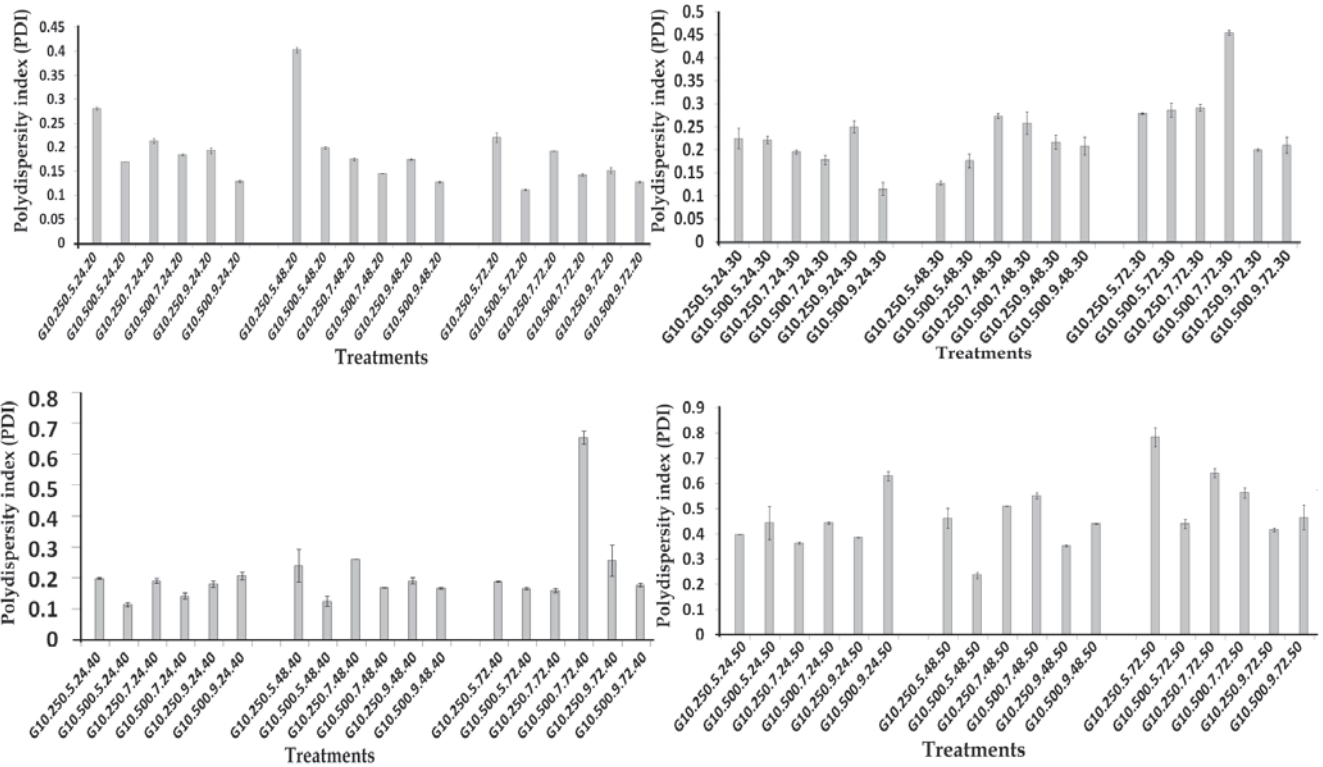

28

29 **Figure S3.** Poly dispersity index (PDI) of gold nanoparticles biosynthesized at different reaction conditions, pH 5.0, 7.0 and 9.0, time 24, 48 and  
 30 72h, HAuCl<sub>4</sub> concentration- 250 and 500 mg/L (a) at 20°C, (b) at 30°C, (c) at 40°C, (d) at 50°C.

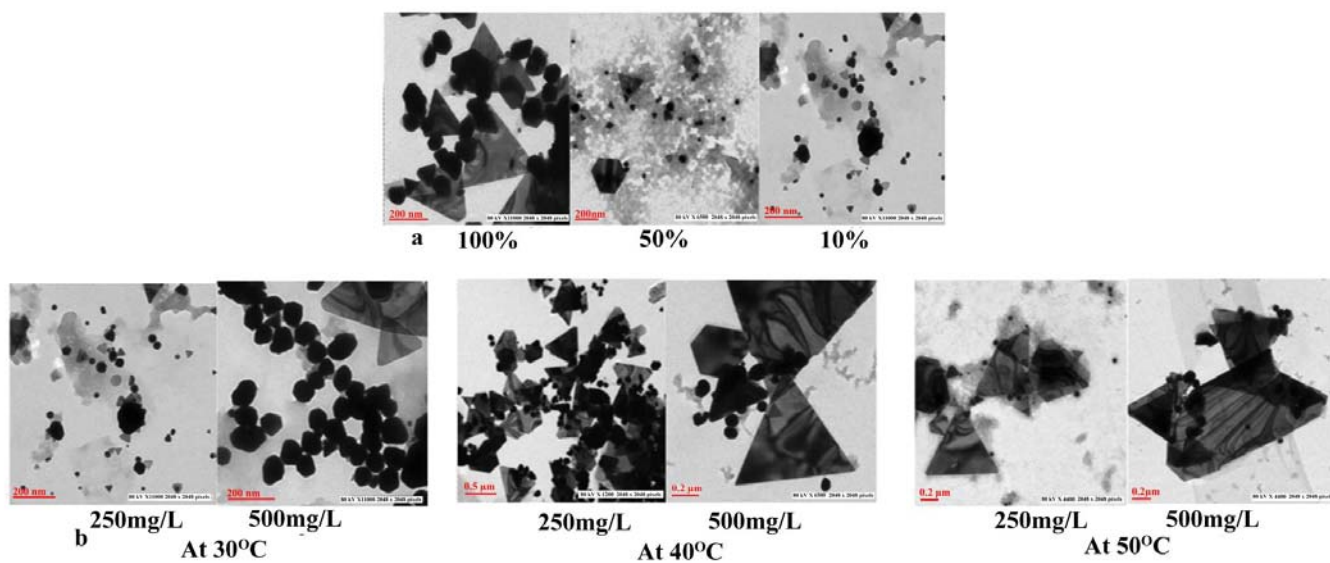

31

32

33 **Figure S4.** TEM micrographs of (a) G100.250.7.72.30, G50.250.7.72.30 and G10.250.7.72.30 showing effect of different concentration of cell  
 34 free extracts and (b) G10.250.7.72.30, G10.500.7.72.30, G10.250.7.72.40, G10.500.7.72.40, G10.250.7.72.50 and G10.500.7.72.50 showing  
 35 effect of HAuCl<sub>4</sub> (250 and 500 mg/L) at different reaction temperatures on the shape and size of gold nanoparticles.

36

37

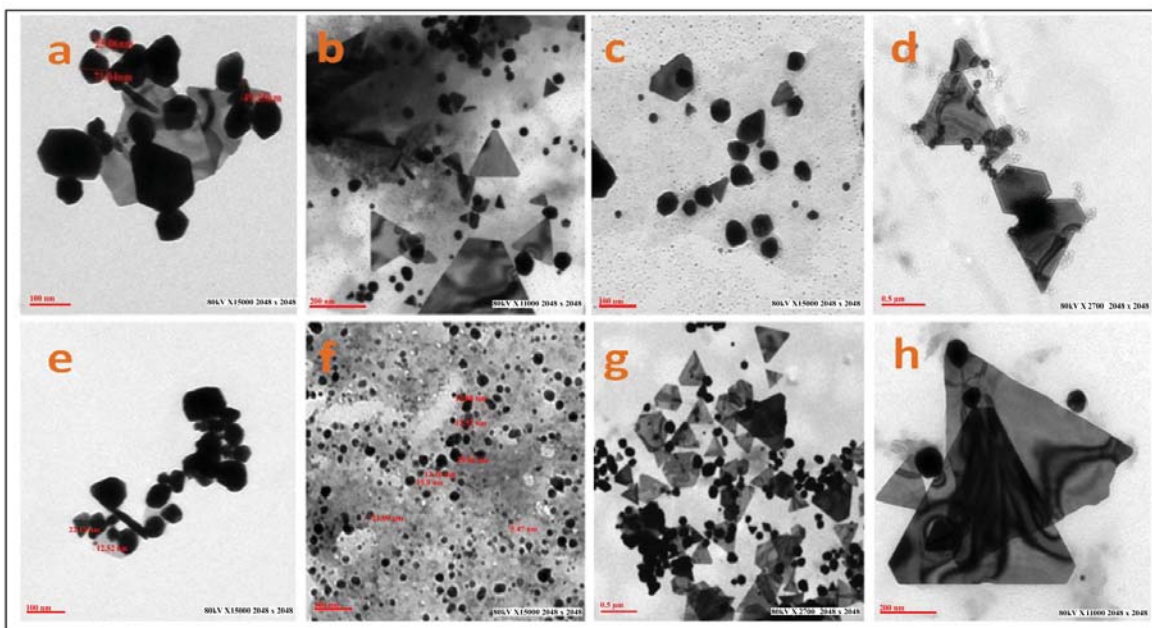

38  
 39  
 40  
 41  
 42  
 43  
 44

**Figure S5.** TEM micrographs of (a) G10.250.5.72.20 (b) G10.250.5.72.30 (c) G10.250.5.72.40 (d) G10.250.5.72.50 (e) G10.500.5.72.20 (f) G10.500.5.72.30 (g) G10.500.5.72.40 (h) G10.500.5.72.50 showing effect of different reaction temperatures at pH 5.0, at different concentration of H<sub>2</sub>AuCl<sub>4</sub> on shape and size of gold nanoparticles (See table 1 for detail).

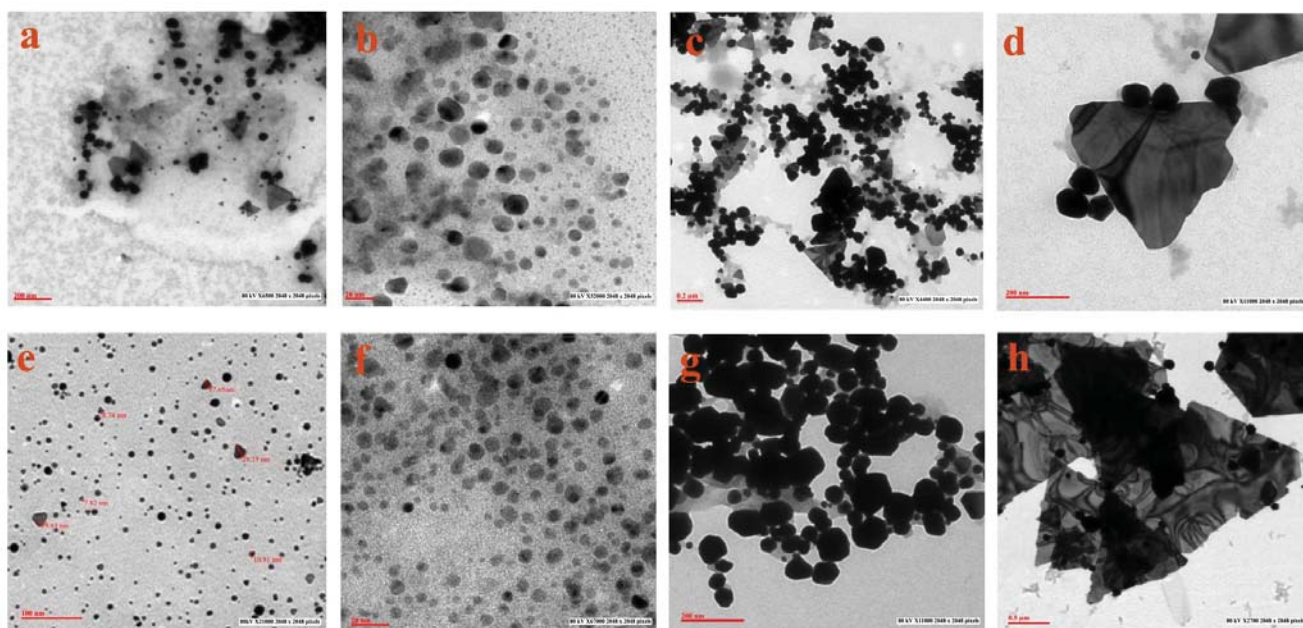

45  
46  
47  
48  
49  
50

**Figure S6.** TEM micrographs of (a) G10.250.9.72.20 (b) G10.250.9.72.30 (c) G10.250.9.72.40 (d) G10.250.9.72.50 (e) G10.500.9.72.20 (f) G10.500.9.72.30 (g) G10.500.9.72.40 (h) G10.500.9.72.50 showing effect of different reaction temperatures at pH 9.0, at different concentration of HAuCl<sub>4</sub> on shape and size of gold nanoparticles (See table 1 for detail).

51

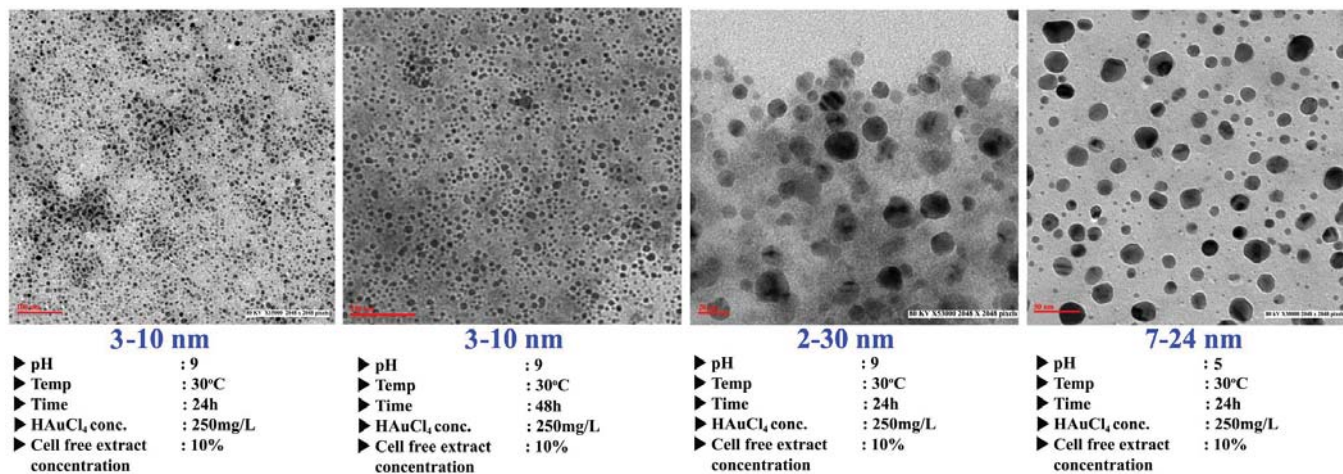

52

53

54

55

56

57

58 **Figure S7.** TEM micrographs and their respective biological and physical conditions for biosynthesis of spherical gold nanoparticles of smallest  
59 size.

60

61

62



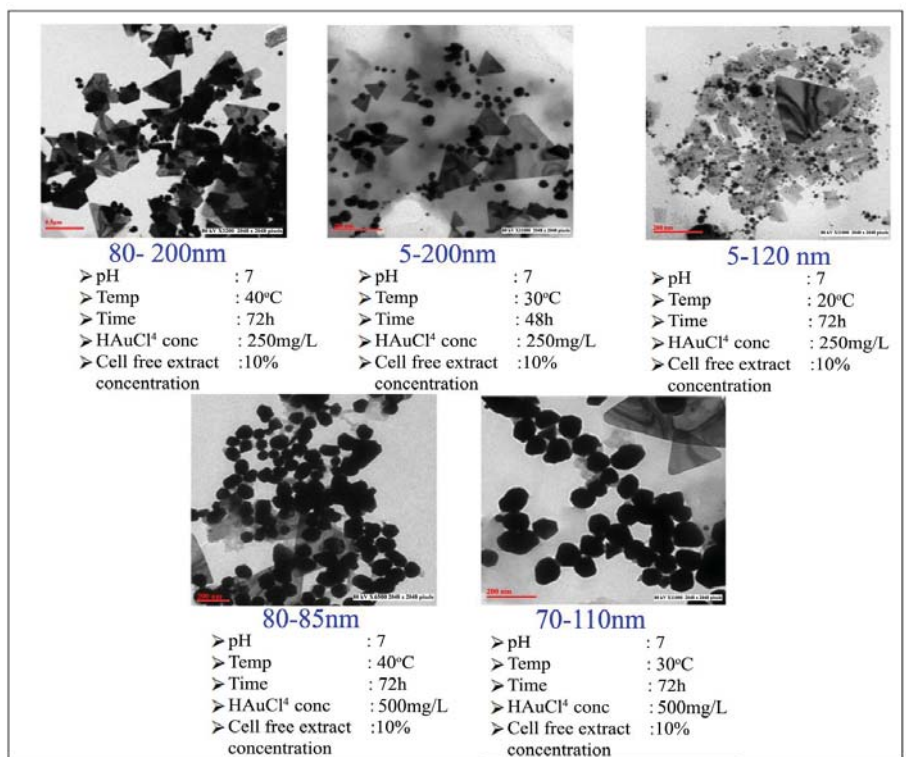

63  
64  
65

**Figure S8.** TEM micrographs and their respective biological and physical conditions for biosynthesis of gold nanoparticles of various shapes.

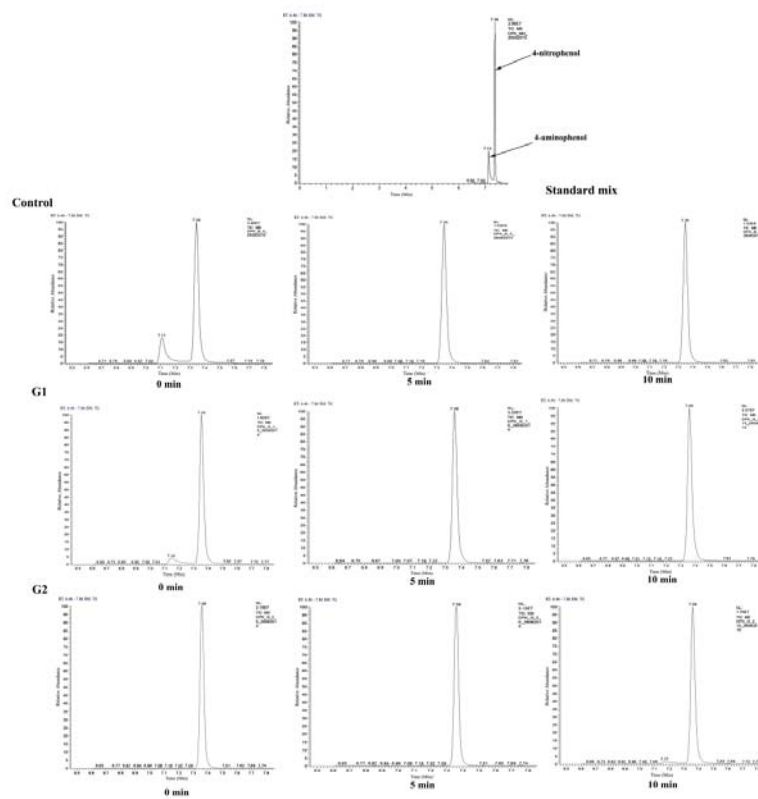

66

67 **Figure S9.** GC-MS/MS analysis of degradation of 4-nitrophenol into 4-aminophenol by different sphere sizes of biosynthesized GNP.

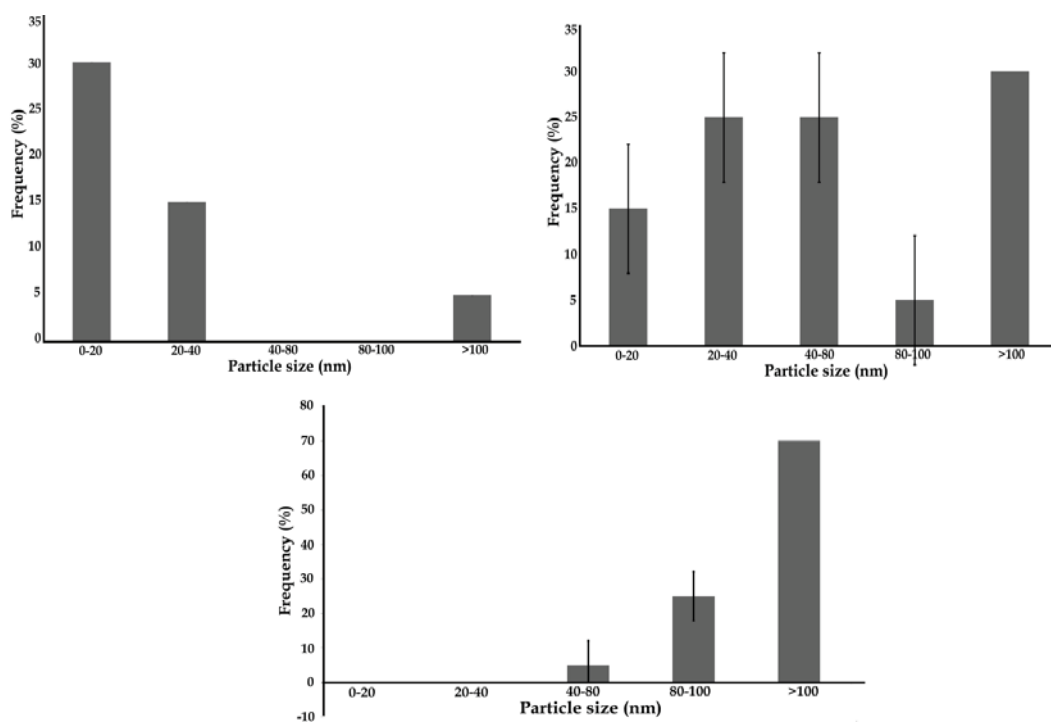

68

69 **Figure S10.** Frequency distribution graph of G100.250.7.72.30, G50.250.7.72.30 and G10.250.7.72.30 showing effect of different concentration  
 70 of cell free extracts (100, 50 and 10%)

71

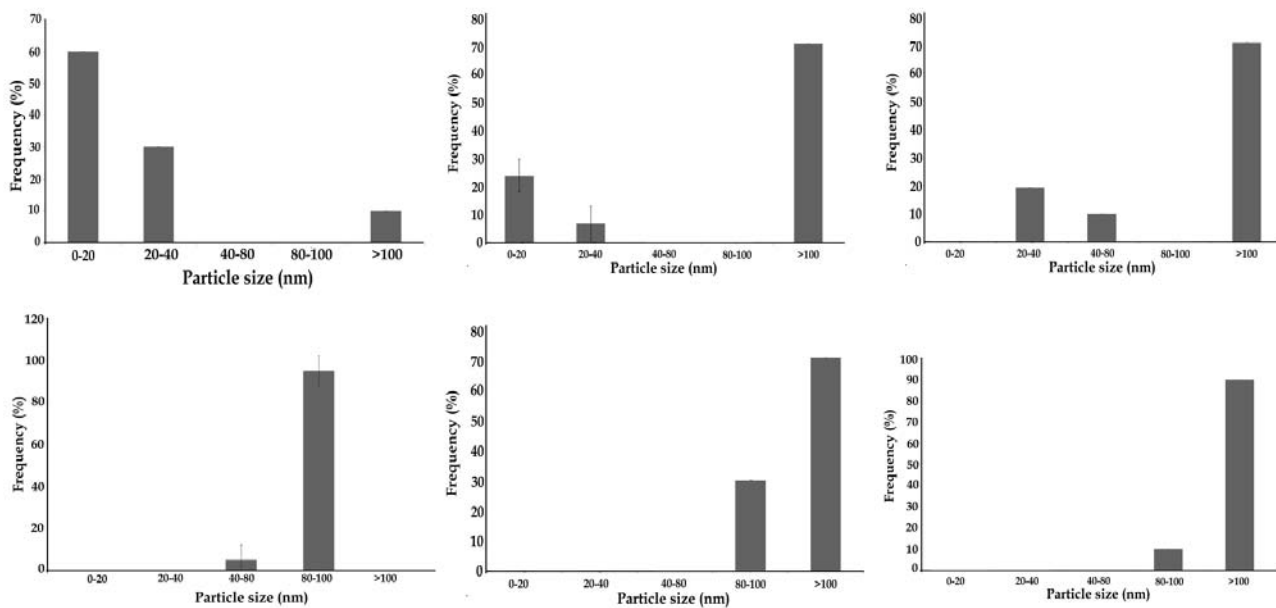

72  
 73 **Figure S11.** Frequency distribution graph of (a) G10.250.7.72.30 (b) G10.250.7.72.40 (c) G10.250.7.72.50 (d) G10.500.7.72.30 (e)  
 74 G10.500.7.72.40 (f) G10.500.7.72.50 showing effect of different gold concentration on shapes and sizes of gold nanoparticles  
 75

76  
 77

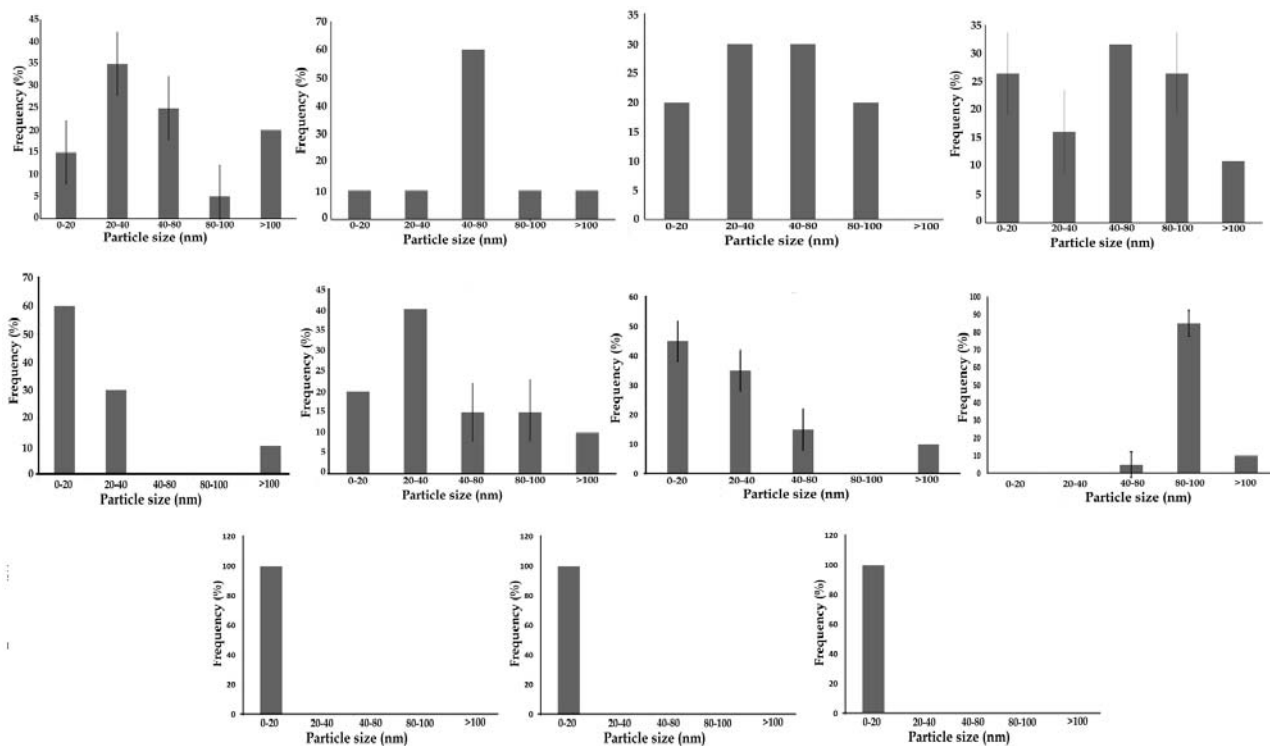

78  
 79 **Figure S12.** Frequency distribution graph of (a) G10.250.5.72.30 (b) G10.250.5.5.72.30 (c) G10.250.6.72.30 (d) G10.250.6.5.72.30 (e)  
 80 G10.250.7.72.30 (f) G10.250.7.5.72.30 (g) G10.250.8.72.30 (h) G10.250.8.5.72.30 (i) G10.250.9.72.30 (j) G10.250.9.5.72.30 (k)  
 81 G10.250.10.72.30 showing effect of different pH on shapes and sizes of gold nanoparticles (See table 1 for detail).

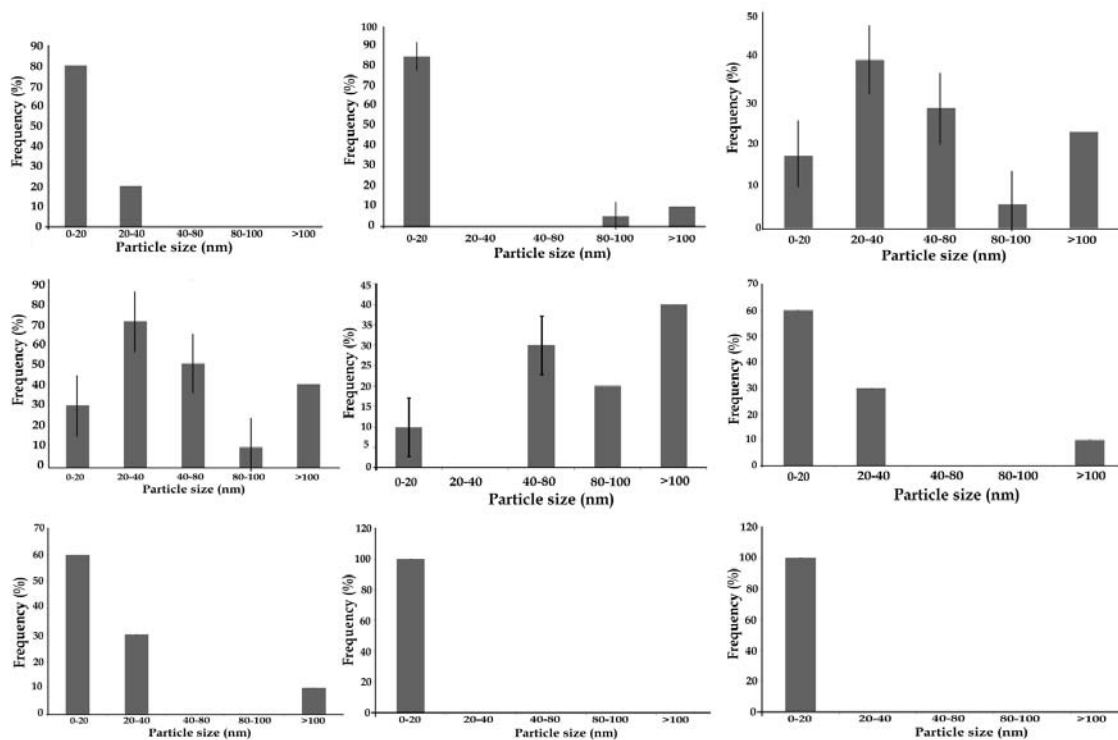

82  
 83 **Figure S13.** Frequency distribution graph of (a) G10.250.5.24.30 (b) G10.250.5.48.30 (c) G10.250.5.72.30 (d) G10.250.7.24.30 (e)  
 84 G10.250.7.48.30 (f) G10.250.7.72.30 (g) G10.250.9.24.30 (h) G10.250.9.48.30 (i) G10.250.9.72.30 showing effect of different time intervals at  
 85 different pH shapes and sizes of gold nanoparticles (See table 1 for detail).

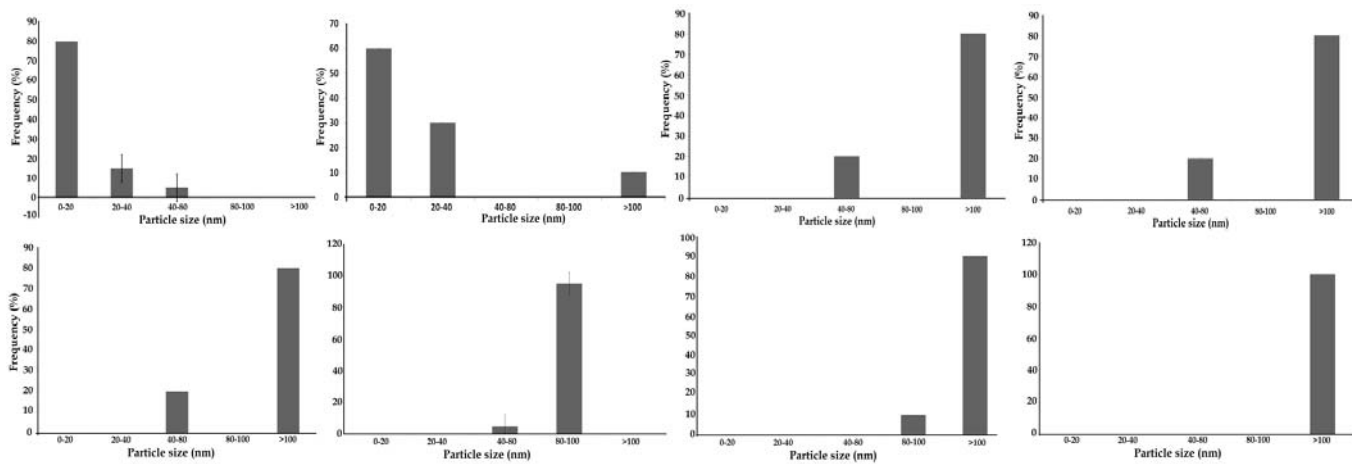

86  
87  
88  
89  
90  
91  
92  
93  
94  
95  
96  
97  
98

**Figure S14.** Frequency distribution graph of (a) G10.250.7.72.20 (b) G10.250.7.72.30 (c) G10.250.7.72.40 (d) G10.250.7.72.50 (e) G10.500.7.72.20 (f) G10.500.7.72.30 (g) G10.500.7.72.40 (h) G10.500.7.72.50 showing effect of different reaction temperatures at pH 7.0, at different concentration of H<sub>2</sub>AuCl<sub>4</sub> on shape and size of gold nanoparticles (See table 1 for detail).

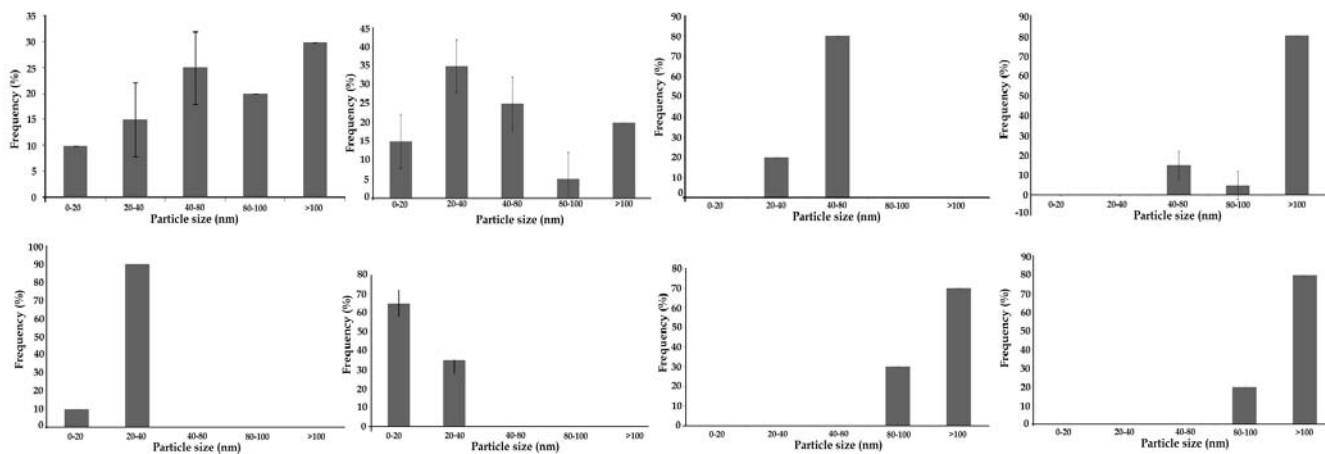

99  
 100  
 101  
 102  
 103  
 104  
 105  
 106  
 107  
 108  
 109  
 110

**Figure S15.** Frequency distribution graph of (a) G10.250.5.72.20 (b) G10.250.5.72.30 (c) G10.250.5.72.40 (d) G10.250.5.72.50 (e) G10.500.5.72.20 (f) G10.500.5.72.30 (g) G10.500.5.72.40 (h) G10.500.5.72.50 showing effect of different reaction temperatures at pH 5.0, at different concentration of HAuCl4 on shape and size of gold nanoparticles (See table 1 for detail).



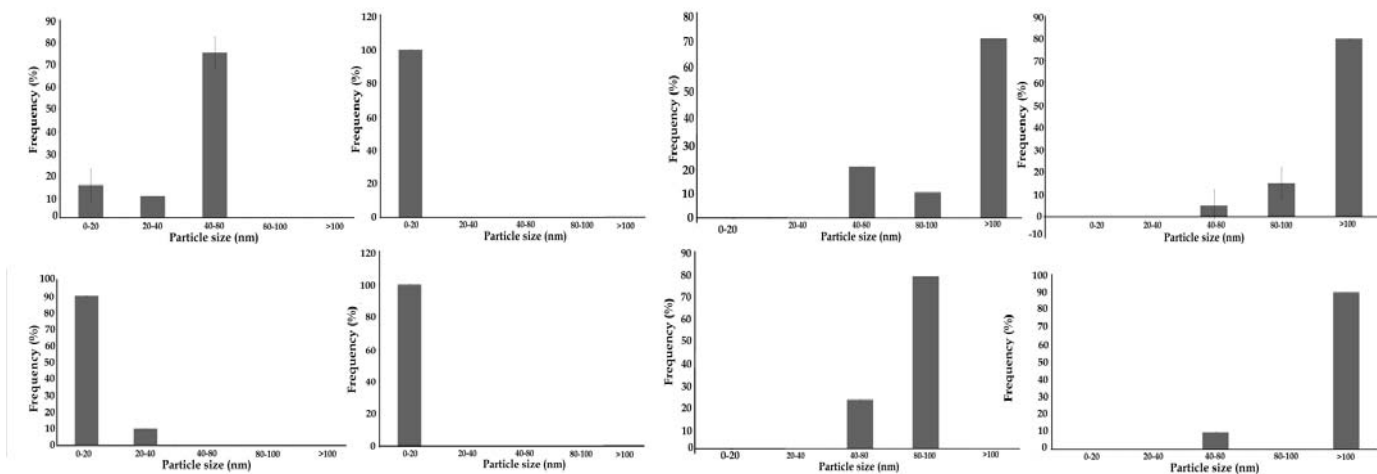

111  
 112  
 113  
 114  
 115  
 116  
 117  
 118  
 119  
 120

**Figure S16.** Frequency distribution graph of (a) G10.250.9.72.20 (b) G10.250.9.72.30 (c) G10.250.9.72.40 (d) G10.250.9.72.50 (e) G10.500.9.72.20 (f) G10.500.9.72.30 (g) G10.500.9.72.40 (h) G10.500.9.72.50 showing effect of different reaction temperatures at pH 9.0, at different concentration of H<sub>2</sub>AuCl<sub>4</sub> on shape and size of gold nanoparticles (See table 1 for detail).

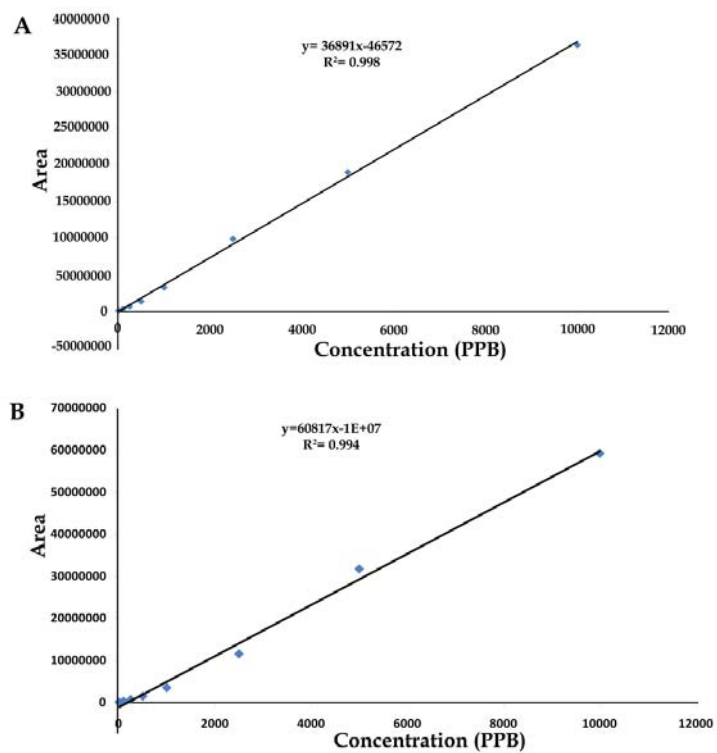

121  
122  
123

**Figure S17.** The calibration graph of (A) 4-NP (B) 4-AP obtained by GC-MS study.
